# TABLE OF CONTENTS

# ANESTHESIOLOGY

Volume 133  
Issue 2  
August 2020

|                                                  |     |
|--------------------------------------------------|-----|
| ◆ This Month in ANESTHESIOLOGY .....             | 1A  |
| Science, Medicine, and the Anesthesiologist..... | 13A |
| Infographics in Anesthesiology .....             | 17A |
| ◆ Editorials                                     |     |

## ◆ Perioperative Gabapentinoids: Deflating the Bubble

E. D. Kharasch, J. D. Clark, S. Kheterpal .....251

SUPPLEMENTAL DIGITAL CONTENT IS AVAILABLE IN THE TEXT

## Postoperative Delirium: A Minefield of Markers and Mediators

J. W. Sleigh, A. Gaskell .....255

## Dexmedetomidine and Cognitive Dysfunction after Critical Illness: What Can (and Cannot) Be Extrapolated from Rodent Models

C. W. Paterson, C. M. Coopersmith.....258

## Neuromodulation for Pain Treatment: Building a Foundation for Future Study

E. Sivanesan, S. P. Cohen .....262

## Perioperative Medicine

### CLINICAL SCIENCE

## ◆ Perioperative Use of Gabapentinoids for the Management of

### Postoperative Acute Pain: A Systematic Review and Meta-analysis

M. Verret, F. Lauzier, R. Zarychanski, C. Perron, X. Savard, A.-M. Pinard, G. Leblanc, M.-J. Cossi, X. Neveu, A. F. Turgeon, and the Canadian Perioperative Anesthesia Clinical Trials (PACT) Group .....265

In a meta-analysis of 281 randomized controlled trials comparing gabapentinoids with controls, no clinically meaningful difference in acute, subacute, or chronic pain was observed. Although the risk of postoperative nausea and vomiting was slightly lower, adverse events of dizziness and visual disturbance were greater with gabapentinoids use. *SUPPLEMENTAL DIGITAL CONTENT IS AVAILABLE IN THE TEXT*

## ◆ Electroencephalogram Burst-suppression during Cardiopulmonary Bypass in Elderly Patients Mediates Postoperative Delirium

J. C. Pedemonte, G. S. Plummer, S. Chamadia, J. J. Locascio, E. Hahn, B. Ethridge, J. Gitlin, R. Ibala, J. Mekonnen, K. M. Colon, M. B. Westover, D. A. D'Alessandro, G. Tolis, T. Houle, K. T. Shelton, J. Qu, O. Akeju .....280

In a retrospective observational substudy of 159 patients undergoing cardiac surgery, there is evidence that burst-suppression during cardiopulmonary bypass mediates the effect of physical function, temperature during cardiopulmonary bypass, and intraoperative electroencephalographic alpha power on postoperative delirium. Delirium was also associated with decreased broadband power in the intraoperative electroencephalogram. *SUPPLEMENTAL DIGITAL CONTENT IS AVAILABLE IN THE TEXT*

## ◆ Goal-directed *versus* Standard Fluid Therapy to Decrease Ileus after Open Radical Cystectomy: A Prospective Randomized Controlled Trial

V. Arslan-Carlon, K. S. Tan, G. Dalbagni, A. C. Pedoto, H. W. Herr, B. H. Bochner, E. K. Cha, T. F. Donahue, M. Fischer, S. M. Donat .....293

In a randomized trial of goal-directed *versus* standard fluid therapy in patients having radical cystectomy, there was no difference in the primary outcome of postoperative ileus. There was no difference between fluid therapies in the secondary outcome of high-grade complications. *SUPPLEMENTAL DIGITAL CONTENT IS AVAILABLE IN THE TEXT*

◆ Refers to This Month in ANESTHESIOLOGY

◆ Refers to Editorials

◆ This article has an Audio Podcast

◆ See Supplemental Digital Content

CME Article

◆ This article has a Video Abstract

◆ Part of the Letheon writing competition

◆ This article has a Visual Abstract

◆ Readers' Toolbox

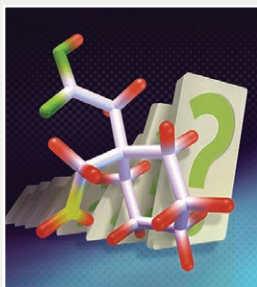

**ON THE COVER:** Gabapentinoids are widely used in the perioperative period for acute pain management, yet the clinical benefit is uncertain. In this issue of ANESTHESIOLOGY, Verret *et al.* present a systematic review and meta-analysis analyzing the analgesic efficacy and adverse events with the perioperative use of gabapentinoids in adult patients. In an accompanying Editorial, Kharasch *et al.* review the evolution of use of perioperative gabapentinoids and conclude that evidence-based practice impels revising if not eliminating the routine use of perioperative gabapentinoids in adults. Cover Illustration: A. Johnson, Vivo Visuals.

- Verret *et al.*: Perioperative Use of Gabapentinoids for the Management of Postoperative Acute Pain: A Systematic Review and Meta-analysis, p. 265
- Kharasch *et al.*: Perioperative Gabapentinoids: Deflating the Bubble, p. 251

-   **Ephedrine versus Phenylephrine Effect on Cerebral Blood Flow and Oxygen Consumption in Anesthetized Brain Tumor Patients: A Randomized Clinical Trial**  
K. U. Koch, I. K. Mikkelsen, J. Aanerud, U. S. Espelund, A. Tietze, G. v. Oettingen, N. Juul, L. Nikolajsen, L. Østergaard, M. Rasmussen.....304

In adult patients with brain tumors, there were no differences in cerebral metabolic rate of oxygen in peritumoral regions or in the contralateral cerebral hemisphere after administration of ephedrine or phenylephrine. *SUPPLEMENTAL DIGITAL CONTENT IS AVAILABLE IN THE TEXT*

-  **Muscular Tissue Oxygen Saturation and Posthysterectomy Nausea and Vomiting: The iMODIPONV Randomized Controlled Trial**  
G. Li, D.-D. Tian, X. Wang, X. Feng, W. Zhang, J. Bao, D.-X. Wang, Y.-Q. Ai, Y. Liu, M. Zhang, M. Xu, D.-L. Mu, X. Zhao, F. Dai, J.-J. Yang, X. Che, D. Yanez, X. Guo, L. Meng, on behalf of the iMODIPONV Research Group.....318

Eight hundred relatively young women having laparoscopic hysterectomies were randomized to routine care or to muscle tissue oxygenation maintained at greater than baseline or 70%, whichever was higher. Guided management improved tissue oxygenation but did not reduce nausea and vomiting. *SUPPLEMENTAL DIGITAL CONTENT IS AVAILABLE IN THE TEXT*

-  **A Systems Theoretic Process Analysis of the Medication Use Process in the Operating Room**  
A. Samost-Williams, K. C. Nanji.....332

A systems theoretic process analysis identified unsafe control actions linked to causal scenarios that could lead to medication errors. Scenarios came from perioperative leadership, management of patient care, and execution of patient care. *SUPPLEMENTAL DIGITAL CONTENT IS AVAILABLE IN THE TEXT*

-   **Substance Use Disorder in Physicians after Completion of Training in Anesthesiology in the United States from 1977 to 2013**  
D. O. Warner, K. Berge, H. Sun, A. Harman, T. Wang.....342

The estimated cumulative 30-yr incidence of substance abuse among graduates of U.S. residency programs is about 1.6%, with opioids and alcohol being the most commonly abused substances. A substantial proportion of anesthesiologists who develop substance use disorder die of the condition, and the risk of relapse is high in those who survive at approximately 40%.

-   **Enhanced Recovery after Lumbar Spine Fusion: A Randomized Controlled Trial to Assess the Quality of Patient Recovery**  
E. M. Soffin, J. D. Beckman, A. Tseng, H. Zhong, R. C. Huang, M. Urban, C. R. Guheen, H.-J. Kim, F. P. Cammisa, J. A. Nejim, F. J. Schwab, I. F. Armendi, S. G. Memtsoudis.....350

Use of an enhanced recovery pathway for patients undergoing one- or two-level lumbar spinal fusion was associated with higher (better) Quality of Recovery-40 scores 3 days after surgery. This difference was not deemed clinically significant, however. Several secondary endpoints including time to oral intake, duration of patient-controlled analgesia use, and day 1 opioid consumption were improved by use of the enhanced recovery pathway. Further refinement of enhanced recovery strategies for spinal surgery is required. *SUPPLEMENTAL DIGITAL CONTENT IS AVAILABLE IN THE TEXT*

## BASIC SCIENCE

### Transient Receptor Potential Cation Channels and Calcium Dyshomeostasis in a Mouse Model Relevant to Malignant Hyperthermia

- J. Rafael Lopez, V. Kaura, P. Hopkins, X. Liu, A. Uryach, J. Adams, P. D. Allen.....364

The hypothesis that transient receptor potential cation channels play a critical role in causing intracellular calcium and sodium overload in malignant hyperthermia susceptible muscle was tested in a *RYR1*-p.G2435R knock-in murine model of malignant hyperthermia. Skeletal muscle of mice expressing *RYR1*-p.G2435R had a significantly enhanced, extracellular  $Ca^{2+}$ -dependent response to TRPC3/6 channel activators. The TRPC3/6 channel activator response could be prevented by TRPC3/6 channel blockers. Local administration of TRPC channel blockers during an active malignant hyperthermia crisis demonstrated that most of the rise in intracellular resting calcium in skeletal muscle comes from the extracellular space and not sarcoplasmic reticulum stores.

-  **Dexmedetomidine Activation of Dopamine Neurons in the Ventral Tegmental Area Attenuates the Depth of Sedation in Mice**  
G. Qiu, Y. Wu, Z. Yang, L. Li, X. Zhu, Y. Wang, W. Sun, H. Dong, Y. Li, J. Hu.....377

Dexmedetomidine, via  $\alpha_2$  receptor-dependent mechanisms, induces activation of dopaminergic neurons in the ventral tegmental area of adult mice. Chemogenetic approaches together with electroencephalographic recordings reveal that the activation of dopaminergic neurons in the ventral tegmental area may contribute to rapid arousability during dexmedetomidine sedation. *SUPPLEMENTAL DIGITAL CONTENT IS AVAILABLE IN THE TEXT*

## Critical Care Medicine

### BASIC SCIENCE

- ◆ **Dexmedetomidine Exerts an Anti-inflammatory Effect via  $\alpha_2$  Adrenoceptors to Prevent Lipopolysaccharide-induced Cognitive Decline in Mice**  
*R. Li, I. K. Lai, J. Z. Pan, P. Zhang, M. Maze* .....393

Administration of dexmedetomidine to mice treated with lipopolysaccharide decreased neuroinflammation and cognitive impairment in both young and aged mice. The effects of dexmedetomidine on neuroinflammation and cognitive impairment in mice treated with lipopolysaccharide are likely mediated by  $\alpha_2$  adrenoceptor-mediated anti-inflammatory pathways.

## Pain Medicine

### BASIC SCIENCE

- ◆◆◆ **Dorsal Root Ganglion Stimulation Alleviates Pain-related Behaviors in Rats with Nerve Injury and Osteoarthritis**  
*G. Yu, I. Segel, Z. Zhang, Q. H. Hogan, B. Pan* .....408

Using a rat model of osteoarthritis, stimulation of both the L3 and L4 dorsal root ganglia reduced nonreflexive knee motion scores and provided conditioned place preference more than sham stimulation. Sensitization from peripheral nerve injury responded to stimulation maximally when provided at two ganglia (L4 and L5) *versus* just one. **SUPPLEMENTAL DIGITAL CONTENT IS AVAILABLE IN THE TEXT**

## Education

### IMAGES IN ANESTHESIOLOGY

- ◆ **Intraoperative Circuit Leak Likely Caused by Surgical Prep**  
*Y. Kojima, K. Hirabayashi, T. Oka* .....426
- SUPPLEMENTAL DIGITAL CONTENT IS AVAILABLE IN THE TEXT**

**E-cigarette and Vaping-associated Lung Injury: What's Lurking Inside!**  
*E. M. Elliott, A. Y. Weintraub, C. R. Francis, R. B. Lindell* .....427

**Plastic Bronchitis**  
*S. Chhabada, S. Khanna* .....429

### CLINICAL FOCUS REVIEW

- ◆ **Perioperative Management of Oral Glucose-lowering Drugs in the Patient with Type 2 Diabetes**  
*J.-C. Preiser, B. Provenzano, W. Mongkolpun, K. Halenarova, M. Cnop* .....430

The right management of oral glucose-lowering drugs aims to identify, assess, and follow patients with diabetes and avoid unnecessary interruptions of the chronic treatment.

## REVIEW ARTICLE

- ◆ **Mineralocorticoid Dysfunction during Critical Illness: A Review of the Evidence**  
*G. D. Nethathe, J. Cohen, J. Lipman, R. Anderson, C. Feldman* .....439

The authors summarize and offer new insights into the mechanisms and clinical implications of the renin-angiotensin-aldosterone system in critical illness, as well as documenting current understanding of the role of mineralocorticoid replacement in this group of patients.

## MIND TO MIND

- ◆ **Dear Dr. Park, it's June again**  
*C. Oliver* .....458
- scrubbing out**  
*K. Niburski* .....460

## Correspondence

- Defining Hypotension during Anesthesia: Comment**  
*J. V. Roth* .....461
- Defining Hypotension during Anesthesia: Comment**  
*J. B. Gross* .....461
- Defining Hypotension during Anesthesia: Reply**  
*C. W. Hogue, K. M. Brady* .....461

**Preventing Infection of Patients and Healthcare Workers Should Be the New Normal in the Era of Novel Coronavirus Epidemics: Comment**  
*M. Á. Gómez-Ríos, R. Casans-Francés, A. Abad-Gurumeta, E. Taboada-López* .....462

**Preventing Infection of Patients and Healthcare Workers Should Be the New Normal in the Era of Novel Coronavirus Epidemics: Reply**  
*A. Bowdle, L. S. Munoz-Price* .....463

**Intubation and Ventilation amid COVID-19: Comment**  
*G. Rigatelli, M. Zuin, A. Rigatelli, G. Zuliani, L. Roncon* .....464

**Intubation and Ventilation amid COVID-19: Reply**  
*L. Zhang, L. Xiong, L. Meng* .....465

**Transesophageal Echocardiogram to the Rescue in Diagnosing Ascending Aortic Pseudoaneurysm: Comment**  
*M. Chen, Y. Yang, X. Zou, W. Zhang, X. Zeng* .....466

|                                                                                                                                                                                           |     |
|-------------------------------------------------------------------------------------------------------------------------------------------------------------------------------------------|-----|
|  <b>Transesophageal Echocardiogram to the Rescue in Diagnosing Ascending Aortic Pseudoaneurysm: Reply</b> |     |
| <i>S. Yu.....</i>                                                                                                                                                                         | 467 |
| <i>SUPPLEMENTAL DIGITAL CONTENT IS AVAILABLE IN THE TEXT</i>                                                                                                                              |     |

|                                                          |     |
|----------------------------------------------------------|-----|
| <b>Preoperative Frailty Assessment: Comment</b>          |     |
| <i>R. L. Johnson, D. I. McIsaac, C. B. Mantilla.....</i> | 468 |

|                                                   |     |
|---------------------------------------------------|-----|
| <b>Preoperative Frailty Assessment: Comment</b>   |     |
| <i>J. N. Darvall, W. K. Lim, D. A. Story.....</i> | 470 |

|                                               |     |
|-----------------------------------------------|-----|
| <b>Preoperative Frailty Assessment: Reply</b> |     |
| <i>A. Sonny, D. I. Sessler.....</i>           | 471 |

|                                                                                                        |     |
|--------------------------------------------------------------------------------------------------------|-----|
| <b>Protective Device during Airway Management in Patients with Coronavirus Disease 2019 (COVID-19)</b> |     |
| <i>F. C. Rahmoune, M. M. Ben Yahia, R. Hajje, S. Pic, K. Chatti.....</i>                               | 473 |

|                                                                                                                                                                                           |     |
|-------------------------------------------------------------------------------------------------------------------------------------------------------------------------------------------|-----|
|  <b>Transesophageal Echocardiography Probe Sheath to Decrease Provider and Environment Contamination</b> |     |
| <i>N. W. Markin, K. A. Cawcutt, S. H. Sayyed, M. E. Rupp, S. J. Lisco....</i>                                                                                                             | 475 |
| <i>SUPPLEMENTAL DIGITAL CONTENT IS AVAILABLE IN THE TEXT</i>                                                                                                                              |     |

|                                                                                                                    |     |
|--------------------------------------------------------------------------------------------------------------------|-----|
| <b>Remote Control and Monitoring of GE Aisys Anesthesia Machines Repurposed as Intensive Care Unit Ventilators</b> |     |
| <i>C. W. Connor, L. J. Palmer, S. Pentakota.....</i>                                                               | 477 |

|                                                                                                                              |     |
|------------------------------------------------------------------------------------------------------------------------------|-----|
| <b>Getting to a New Normal: Mandating That Patients Wear Masks as Hospitals Fully Reopen during the Coronavirus Pandemic</b> |     |
| <i>R. Liu, L. A. Fleisher.....</i>                                                                                           | 479 |

|                                                                                                        |     |
|--------------------------------------------------------------------------------------------------------|-----|
| <b>Videolaryngoscopy Intubation in Patients with COVID-19: How to Minimize Risk of Aerosolization?</b> |     |
| <i>A. Zeidan, M. Bamadhaj, M. Al-Faraidy, M. Ali.....</i>                                              | 481 |
| <i>SUPPLEMENTAL DIGITAL CONTENT IS AVAILABLE IN THE TEXT</i>                                           |     |

|                                                                                                   |     |
|---------------------------------------------------------------------------------------------------|-----|
| <b>Considerations for Assessing Risk of Provider Exposure to SARS-CoV-2 after a Negative Test</b> |     |
| <i>D. R. Long, J. E. Sunshine, W. V. Cleve.....</i>                                               | 483 |

|                                                                |     |
|----------------------------------------------------------------|-----|
| <b>An Online Educational Platform in the COVID-19 Pandemic</b> |     |
| <i>L. L. Yang, J. L. Stevens, M. J. Campbell.....</i>          | 485 |

|                         |            |
|-------------------------|------------|
| <b>Retraction .....</b> | <b>487</b> |
|-------------------------|------------|

|                      |            |
|----------------------|------------|
| <b>Erratum .....</b> | <b>488</b> |
|----------------------|------------|

## **Anesthesiology Reflections from the Wood Library-Museum**

|                                                                                          |     |
|------------------------------------------------------------------------------------------|-----|
| <b>Future Nobelist Richard Wilstätter Synthesizes Tropacocaine: Raise a Cup of Java!</b> |     |
| <i>Melissa L. Coleman and George S. Bause.....</i>                                       | 349 |

|                                                                                           |     |
|-------------------------------------------------------------------------------------------|-----|
| <b>Beacon, Not Buccaneer: Ramón Betances, Puerto Rican Patriot and Chloroform Pioneer</b> |     |
| <i>Jane S. Moon and George S. Bause.....</i>                                              | 363 |

|                                                                                                         |     |
|---------------------------------------------------------------------------------------------------------|-----|
| <b>Byline Backstory No. 7: Following the Historic Footsteps of Snow in Anesthesia and Public Health</b> |     |
| <i>George S. Bause.....</i>                                                                             | 392 |

|                                  |            |
|----------------------------------|------------|
| <b>Careers &amp; Events.....</b> | <b>19A</b> |
|----------------------------------|------------|

## INSTRUCTIONS FOR AUTHORS

The most recently updated version of the Instructions for Authors is available at [www.anesthesiology.org](http://www.anesthesiology.org). Please refer to the Instructions for the preparation of any material for submission to ANESTHESIOLOGY.

Manuscripts submitted for consideration for publication must be submitted in electronic format via Editorial Manager (<https://www.editorialmanager.com/aln>). Detailed directions for submission and the most recent version of the Instructions for Authors can be found on the Journal's Web site (<http://www.anesthesiology.org>). Books and educational materials for review should be sent to Alan Jay Schwartz, M.D., M.S.Ed., Director of Education, Department of Anesthesiology and Critical Care Medicine, The Children's Hospital of Philadelphia,

34th Street and Civic Center Blvd., Room 9327, Philadelphia, Pennsylvania 19104-4399. Article-specific permission requests are managed with Copyright Clearance Center's Rightslink service. Information can be accessed directly from articles on the journal Web site. More information is available at <http://anesthesiology.pubs.asahq.org/public/rightsandpermissions.aspx>. For questions about the Rightslink service, e-mail [customer-care@copyright.com](mailto:customer-care@copyright.com) or call 877-622-5543 (U.S. only) or 978-777-9929. Advertising and related correspondence should be addressed to Advertising Manager, ANESTHESIOLOGY, Wolters Kluwer Health, Inc., Two Commerce Square, 2001 Market Street, Philadelphia, Pennsylvania 19103 (Web site: <http://www.wkadcenter.com/>). Publication of an advertisement in ANESTHESIOLOGY does not constitute endorsement by the Society or Wolters Kluwer Health, Inc. of the product or service described therein or of any representations made by the advertiser with respect to the product or service.

**ANESTHESIOLOGY** (ISSN 0003-3022) is published monthly by Wolters Kluwer Health, Inc., 14700 Citicorp Drive, Bldg 3, Hagerstown, MD 21742. Business office: Two Commerce Square, 2001 Market Street, Philadelphia, PA 19103. Periodicals postage paid at Hagerstown, MD, and at additional mailing offices. Copyright © 2020, the American Society of Anesthesiologists, Inc. All Rights Reserved.

**Annual Subscription Rates:** *United States*—\$1026 Individual, \$2451 Institution, \$413 In-training. *Rest of World*—\$1082 Individual, \$2721 Institution, \$413 In-training. Single copy rate \$245. Subscriptions outside of North America must add \$57 for airfreight delivery. Add state sales tax, where applicable. The GST tax of 7% must be added to all orders shipped to Canada (Wolters Kluwer Health, Inc.'s GST Identification #895524239, Publications Mail Agreement #1119672). Indicate in-training status and name of institution. Institution rates apply to libraries, hospitals, corporations, and partnerships of three or more individuals. Subscription prices outside the United States must be prepaid. Prices subject to change without notice. Subscriptions will begin with currently available issue unless otherwise requested. Visit us online at [www.lww.com](http://www.lww.com).

Individual and in-training subscription rates include print and access to the online version. Online-only subscriptions for individuals (\$339) and persons in training (\$339) are available to nonmembers and may be ordered by downloading a copy of the Online Subscription FAXback Form from the Web site, completing the information requested, and faxing the completed form to 301-223-2400. Institutional rates are for print only; online subscriptions are available via Ovid. Institutions can choose to purchase a print and online subscription together for a discounted rate. Institutions that wish to purchase a print subscription, please contact Wolters Kluwer Health, Inc., 14700 Citicorp Drive, Bldg 3, Hagerstown, MD 21742; phone: 800-638-3030; fax: 301-223-2400. Institutions

that wish to purchase an online subscription or online with print, please contact the Ovid Regional Sales Office near you or visit [www.ovid.com/site/index.jsp](http://www.ovid.com/site/index.jsp) and select Contact and Locations.

**Address for non-member subscription information, orders, or change of address** (except Japan): Wolters Kluwer Health, Inc., 14700 Citicorp Drive, Bldg 3, Hagerstown, MD 21742; phone: 800-638-3030; fax: 301-223-2400. In Japan, contact Wolters Kluwer Health Japan Co., Ltd., Forecast Mita Building 5th floor, 1-3-31 Mita Minato-ku, Tokyo, Japan 108-0073; phone: +81 3 5427 1969.

**Address for member subscription information, orders, or change of address:** Members of the American Society of Anesthesiologists receive the print and online journal with their membership. To become a member or provide a change of address, please contact the American Society of Anesthesiologists, 1061 American Lane, Schaumburg, Illinois 60173-4973; phone: 847-825-5586; fax: 847-825-1692; e-mail: [membership@ASAhq.org](mailto:membership@ASAhq.org). For all other membership inquiries, contact Wolters Kluwer Health, Inc., Customer Service Department, P.O. Box 1610, Hagerstown, MD 21740; phone: 800-638-3030; fax: 301-223-2400.

**Postmaster:** Send address changes to ANESTHESIOLOGY, P.O. BOX 1610, Hagerstown, MD 21740.

**Advertising:** Please contact Hilary Druker, National Account Manager, Health Learning, Research & Practice, Medical Journals, Wolters Kluwer Health, Inc.; phone: 609-304-9187; e-mail: [Hilary.Druker@wolterskluwer.com](mailto:Hilary.Druker@wolterskluwer.com). For classified advertising: Dave Wiegand, Recruitment Advertising Representative, Wolters Kluwer Health, Inc.; phone: 847-361-6128; e-mail: [Dave.Wiegand@wolterskluwer.com](mailto:Dave.Wiegand@wolterskluwer.com).
